# Supplementary material
Source: PubMed Central journal article supplement (PMC2897338)
Supplement: supp_192_14_3629__1.pdf [file supp_192_14_3629__1.pdf]

**FIG. S1. 2D SDS-PAGE of cytoplasmic proteins from *S. pneumoniae* Rx1 (strain Sp1).** Cytoplasmic proteins were separated using IPG strips pH 3-5.6 in the first dimension (1D) and 12,5% acrylamide gels in the second dimension (2D). Gels were stained with colloidal Coomassie blue G-250. Rectangle borders the part of the gel containing phosphoproteins PP1, PP2 and PP3 (Fig. 3A).

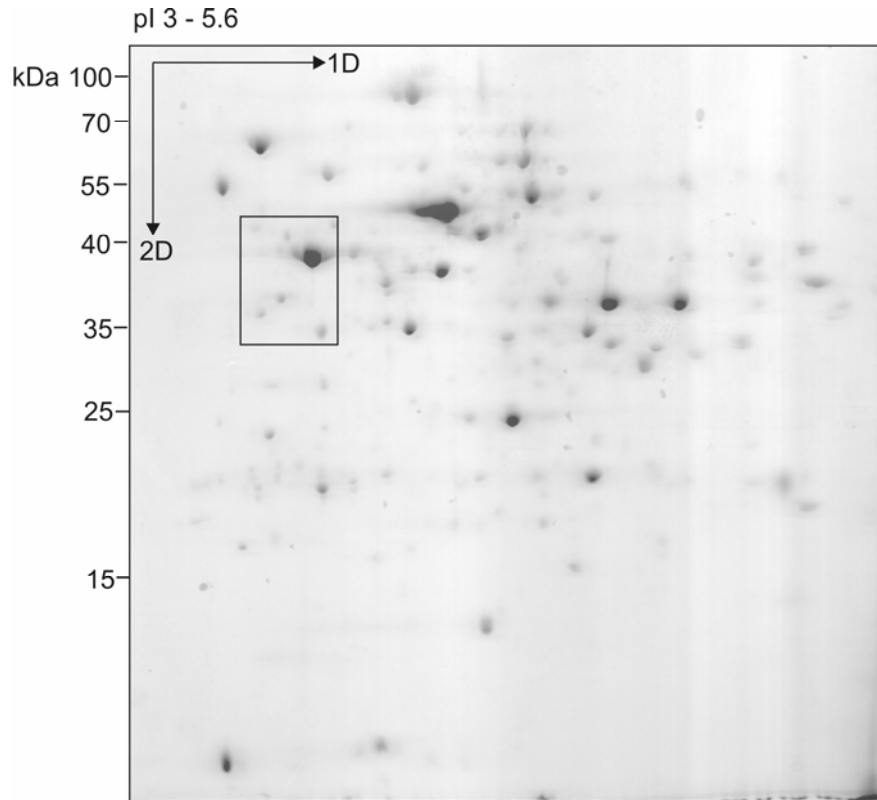

**FIG. S2. 2D SDS-PAGE of membrane proteins from *S. pneumoniae* Rx1 (strain Sp1).**

Membrane proteins were solubilized in lysis buffer containing 4% CHAPS and separated using IPG strips pH 3-5.6 in the first dimension (1D) and 12,5% acrylamide gels in the second dimension (2D). Gels were stained with colloidal Coomassie blue G-250. Rectangle borders the part of the gel containing phosphoproteins PP1, PP2 and PP3 (Fig. 3B).

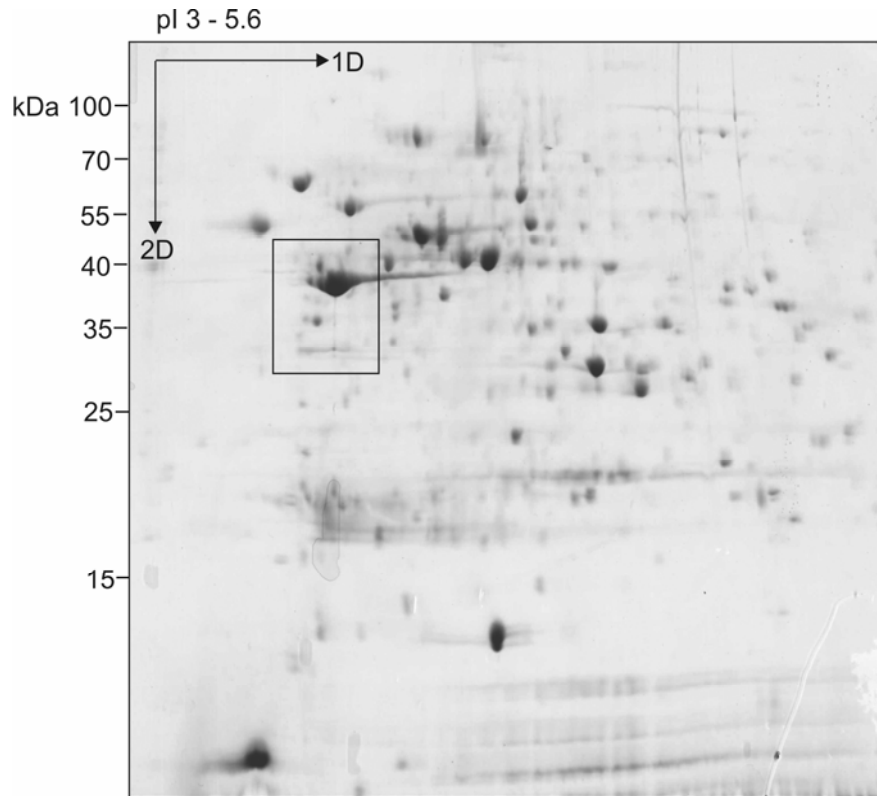

**FIG. S3. 2D SDS-PAGE of membrane proteins from *S. pneumoniae* Rx1 (strain Sp1).** Membrane proteins were solubilized in lysis buffer containing 4% CHAPS, 1% ASB14, 1% Triton X-100 and separated using IPG strips pH 3-10 in the first dimension (1D) and 12,5% acrylamide gels in the second dimension (2D). Gels were stained with colloidal Coomassie blue G-250. Rectangle borders the part of the gel containing phosphoproteins PP1, PP2 and PP4 (Fig. 3C).

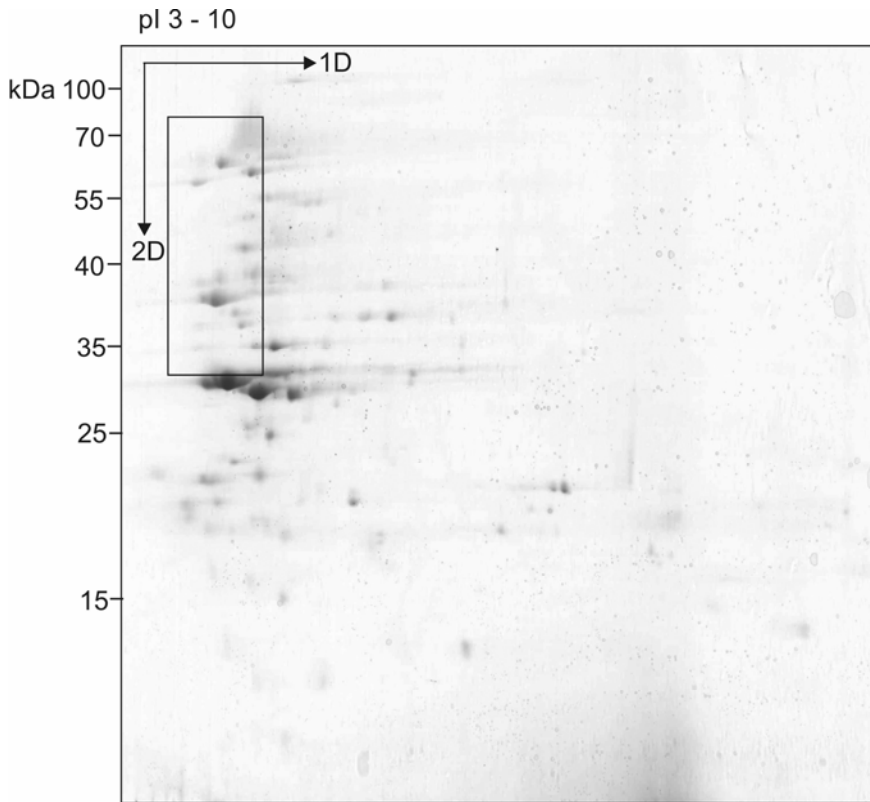

**FIG. S4. Immunodetection of DivIVA and RpoA.** Cytoplasmic proteins from *S. pneumoniae* Rx1 were separated on 2D SDS-PAGE using 13 cm IPG strips pH 4-7 in the first dimension and 12% acrylamide gels in the second dimension. Gels were immunoblotted and probed with antibody against phospho-threonine (anti-pThr), DivIVA (anti-DivIVA) or RpoA (anti-RpoA). Black arrows indicate proteins corresponding to phosphoproteins PP1 and PP2; white arrow indicates protein spot corresponding to enolase.

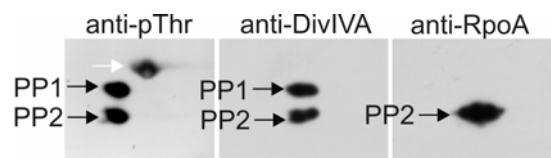

TABLE S1: Descriptive statistical analysis of the cell sizes ( $\mu\text{m}$ )

| <b>Strain</b>                | <b>minimum</b> | <b>1. quantile</b> | <b>median</b> | <b>average</b> | <b>3. quantile</b> | <b>maximum</b> |
|------------------------------|----------------|--------------------|---------------|----------------|--------------------|----------------|
| Sp1 (WT Rx1)                 | 0.920          | 1.590              | 1.945         | 2.047          | 2.397              | 4.290          |
| Sp10 ( $\Delta\text{stkP}$ ) | 0.920          | 1.820              | 2.200         | 2.360          | 2.667              | 8.280          |
